# Supplementary material for: Fabrication and properties of a superhydrophobic film on an electroless plated magnesium alloy
Source: Royal Society of Chemistry journal article supplement (doi:10.1039/c7ra04387b), 2017-01-01
Supplement: c7ra04387b1.pdf [file c7ra04387b1.pdf]

## Electronic Supplementary Information

Fabrication and properties of superhydrophobic film on electroless plated magnesium alloy

Jing Yuan<sup>a,b</sup>, Jihui Wang<sup>a, c\*</sup>, Kaili Zhang<sup>c</sup>, Wenbin Hu<sup>c</sup>

a. State Key Laboratory of Hydraulic Engineering Simulation and Safety, Tianjin University, Tianjin 300072, P R China

b. College of Physics Electronic Information Engineering, Qinghai University for Nationalities, Xining, Qinghai 810007, P R China

c. Tianjin Key Laboratory of Composite and Functional Materials, School of Materials Science and Engineering, Tianjin University, Tianjin 300072, P R China

---

\* Corresponding author  
Email address: [jhwang@tju.edu.cn](mailto:jhwang@tju.edu.cn)

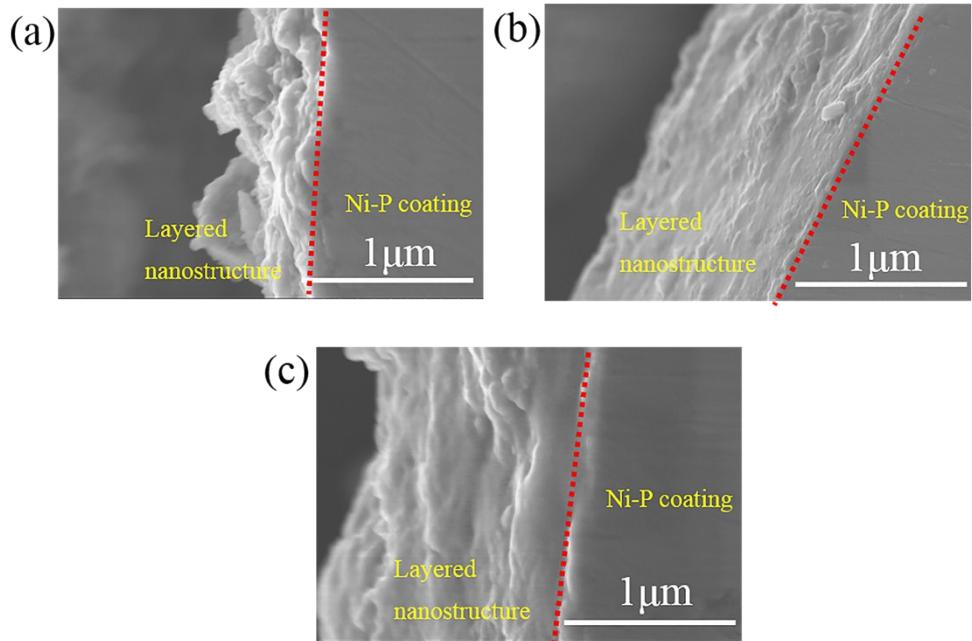

Fig. S1 Cross-section morphologies of sample after hydrothermal reaction for 15h under different reaction temperatures: (a) 120°C, (b) 140°C and (c) 160°C.

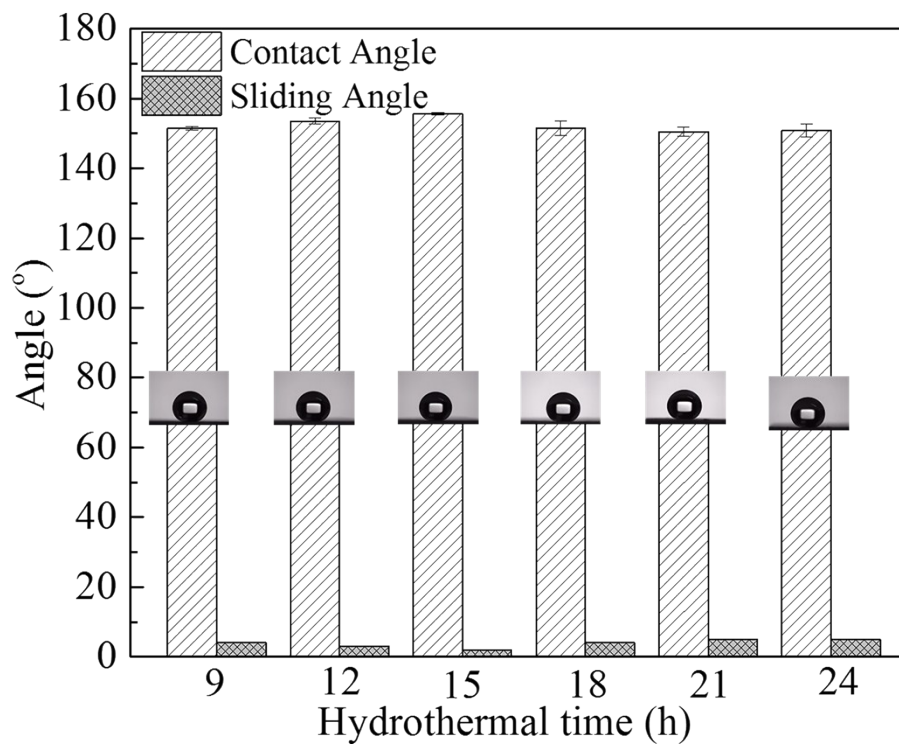

Fig. S2. Variation of water contact angle and sliding angle of superhydrophobic film with hydrothermal reaction time.

The XRD pattern of S1 (AZ61 magnesium alloy), the diffraction peaks at 32.2°, 34.4°, 36.6°, 47.8°, 57.4°, 63.1° and 68.7° were attributed to (100), (002), (101), (102), (110), (103) and (112) planes of  $\alpha$ -Mg phase, but peaks at 36.2° and 40.2° corresponded to (321) and (400) planes of  $\beta$ -Mg<sub>17</sub>Al<sub>12</sub> phase.

The FT-IR spectra of S3 (Ni<sub>3</sub>(NO<sub>3</sub>)<sub>2</sub>(OH)<sub>4</sub>) reveals the existence of -OH stretching vibration (~3600 cm<sup>-1</sup>), C-H bending vibration (~1380 cm<sup>-1</sup>), -OH bending vibration (~647 cm<sup>-1</sup>), -NO<sub>3</sub> bending vibrations (~996 cm<sup>-1</sup>, ~1316 cm<sup>-1</sup>), Ni-O vibration and Ni-O-H bending vibration (~480 cm<sup>-1</sup>). In addition, the peaks observed at 1497 cm<sup>-1</sup> is assigned to the various vibrational modes of the carbonate groups originating from the adsorption of atmospheric CO<sub>2</sub>.<sup>1</sup>

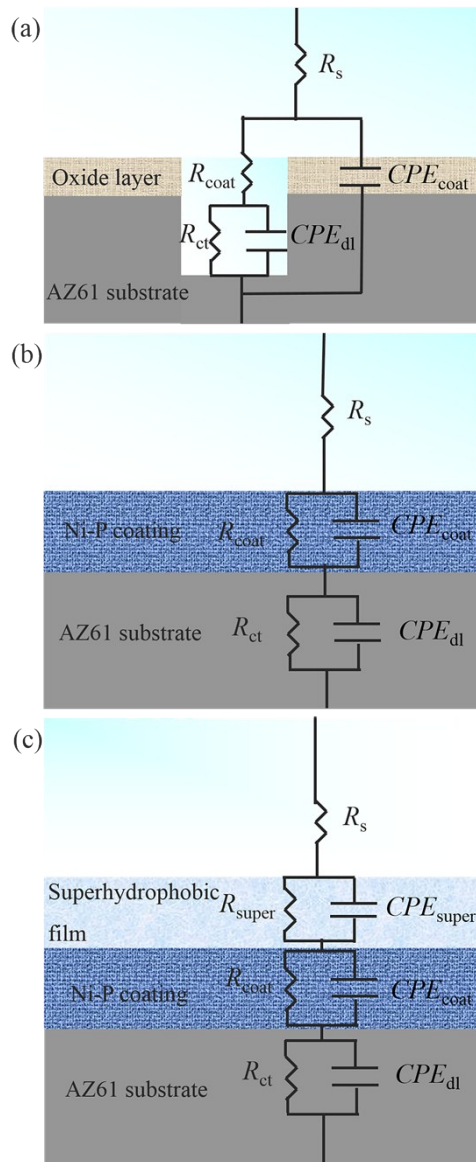

Fig. S3 Equivalent circuit for EIS spectra of (a) AZ61 substrate, (b) Ni-P coating and (c) superhydrophobic surface.

The origin of various components of the equivalent circuit.  $R_s$ : electrolyte solution;  $CPE_{coat}$  and  $R_{coat}$ : Ni-P coating (oxide layer for AZ61 substrate);  $CPE_{super}$  and  $R_{super}$ : superhydrophobic film;  $CPE_{dl}$  and  $R_{ct}$ : double electric layer of AZ61 substrate.

Table S1 EIS fitting parameters of AZ61 substrate, Ni-P coating and superhydrophobic film in 3.5%NaCl solution.

|                       | $R_s$                          | $Q_{\text{super}}-Y_0$ | $n_{\text{air}}$ | $R_{\text{super}}$             | $Q_{\text{coat}}-Y_0$ | $n_{\text{coat}}$ | $R_{\text{coat}}$              | $Q_{\text{dl}}-Y_0$  | $n_{\text{dl}}$ | $R_{\text{ct}}$                |
|-----------------------|--------------------------------|------------------------|------------------|--------------------------------|-----------------------|-------------------|--------------------------------|----------------------|-----------------|--------------------------------|
|                       | ( $\Omega \cdot \text{cm}^2$ ) | (A/cm <sup>2</sup> )   |                  | ( $\Omega \cdot \text{cm}^2$ ) | (A/cm <sup>2</sup> )  |                   | ( $\Omega \cdot \text{cm}^2$ ) | (A/cm <sup>2</sup> ) |                 | ( $\Omega \cdot \text{cm}^2$ ) |
| AZ61 substrate        | 13.3                           | --                     | --               | --                             | $1.5 \times 10^5$     | 0.9               | $5.6 \times 10^2$              | 10.3                 | 0.9             | $1.6 \times 10^3$              |
| Ni-P coating          | 10.2                           | --                     | --               | --                             | $2.4 \times 10^2$     | 0.8               | $6.1 \times 10^3$              | 31.9                 | 0.9             | $3.4 \times 10^3$              |
| Superhydrophobic flim | 1.0                            | $6.3 \times 10^{-7}$   | 0.7              | $5.8 \times 10^5$              | $4.6 \times 10^{-7}$  | 0.7               | $5.0 \times 10^4$              | $2.5 \times 10^{-6}$ | 0.7             | $1.1 \times 10^7$              |

1. H.F. Zhang, M. Liu, H.S. Fan and X.D. Zhang, *Mater. Lett.*, 2012, 75, 26-28.
